# Supplementary material
Source: Springer Nature journal article supplement (https://www.springermedizin.de/resource/supplementary/12889_2006_857_MOESM2_ESM.pdf/9501928)

percent

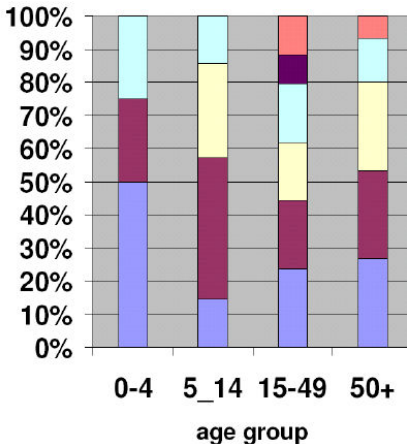

traffic

falls

cuts/stabs

blunt

burns

other

Supplement: MOESM2 [file 9501928]
